# Supplementary material
Source: publisher site journal article supplement (https://www.spandidos-publications.com/6925/downloadSupplementary)
Supplement: Supplementary file 1 [file downloadSupplementary]

## Sheet: Sheet1
Table SI. Firmicutes/Bacteroidetes ratio.
	Control	APS2.5	APS5	APS10	Asthma	DXM
Candidatus_Saccharibacteria	0.0214316995115378	0.00703065619457816	0.0114696952659395	0.0156390501471107	0.0085518853810773	0.005475721404566
Firmicutes	0.60318005726798	0.765937737522169	0.689201244424454	0.623662875599773	0.768083166911371	0.63282245914938
Others	0.00113188479029813	0.00386369394476818	0.00258630383447655	0.0010646639474574	0.00158651738558635	4.20095028392629E-4
Tenericutes	6.19841670877548E-4	7.91740562452496E-5	1.49930657071105E-4	1.22292480451187E-4	1.11334553374481E-4	3.76636922007185E-4
Nitrospirae	2.69496378642412E-5	7.91740562452496E-6	0.0	0.0	0.0	0.0
Chloroflexi	1.34748189321206E-5	0.0	0.0	1.43873506413162E-5	0.0	0.0
Actinobacteria	0.00480377294930099	0.00110051938180897	9.82045803815735E-4	0.00112221335002266	0.00184397854026484	0.00115888283694518
Verrucomicrobia	2.02122283981809E-4	3.08778819356473E-4	1.12447992803328E-4	2.08616584299084E-4	3.06170021779822E-4	4.20095028392629E-4
Cyanobacteria	0.0	0.0	9.7454927096218E-5	0.0	0.0	0.0
Bacteroidetes	0.266208522822975	0.145395236888776	0.261321638742082	0.300767565156714	0.177467278078922	0.204832541430061
Deferribacteres	1.28010779855146E-4	0.00102926273118824	5.99722628284418E-5	3.59683766032904E-5	6.95840958590505E-5	2.39019585119944E-4
Proteobacteria	0.102226713828533	0.0752311882442361	0.0340042730237265	0.0573335923056449	0.0419800850317651	0.154001042994553
Fusobacteria	2.69496378642412E-5	1.58348112490499E-5	1.49930657071105E-5	2.87747012826323E-5	0.0	2.53505620581759E-4
Firmicutes/Bacteroidetes	2.26582	5.26797	2.63737	2.07357	4.32803	3.08946
